# Supplementary material
Source: PubMed Central journal article supplement (PMC4897183)
Supplement: cr201653x1.pdf [file cr201653x1.pdf]

Supplementary information

Supplementary Figure 1

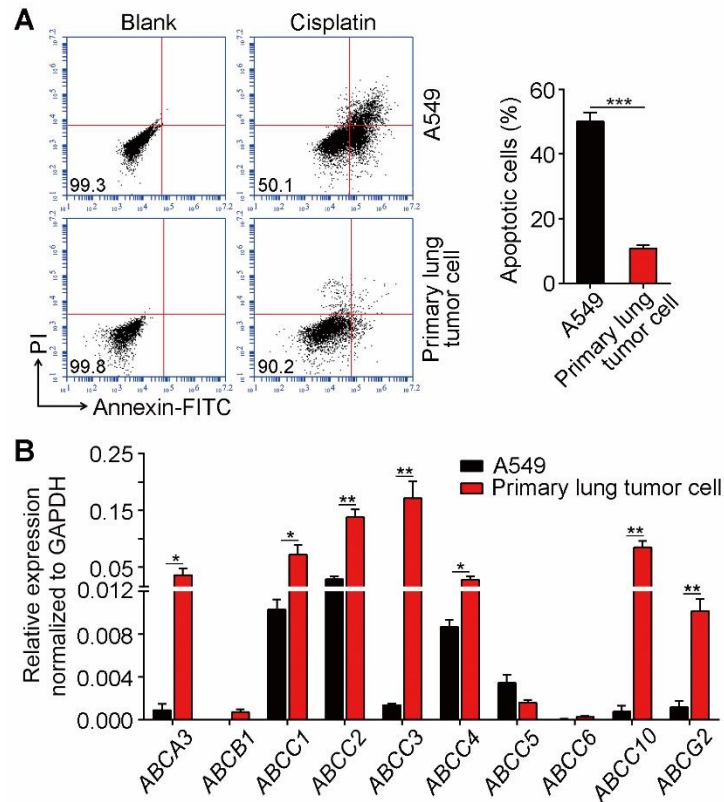

**Supplementary information, Figure S1. The primary lung tumor cells were drug resistant compared with A549 cell line (Related to Figure 1).** (A) The primary lung tumor cells in the malignant fluid from patients were cisplatin resistant compared with A549 cell line. The primary lung tumor cells ( $5 \times 10^4$ ) and A549 cells ( $5 \times 10^4$ ) were treated with  $2 \mu\text{g/ml}$  cisplatin for 36 hours, respectively. The cells were collected and stained with FITC-conjugated Annexin-V and PI for apoptotic detection by flow cytometry. (B) The primary lung tumor cells showed high expression of multidrug resistance genes compared with A549 cell line by real-time PCR analysis. For all graphs, error bars indicate mean  $\pm$  s.e.m.;  $n=3$  independent experiments. \* $P < 0.05$ , \*\* $P < 0.01$ , \*\*\* $P < 0.001$  (Student's *t*-test).
