# Supplementary material
Source: PubMed Central journal article supplement (PMC4897183)
Supplement: cr201653x2.pdf [file cr201653x2.pdf]

Supplementary Figure 2

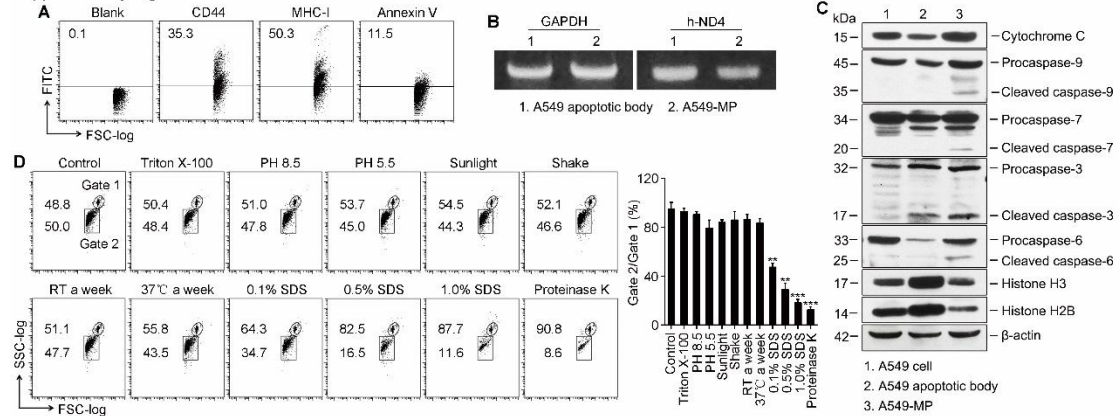

**Supplementary information, Figure S2. Characterization of A549 tumor cell-derived MPs (Related to Figure 1).** (A) Membrane surface molecules were expressed on A549-MPs. A549-MPs were isolated from UV-treated A549 cells and stained with different FITC-conjugated Abs (CD44, MHC-I and Annexin V) and analyzed by flow cytometry. (B-C) A549-MP and A549 apoptotic body were isolated from UV-treated A549 cells. A549-MPs were lysed with 0.5% SDS and the pellet was treated with RNase. Genomic (GAPDH) and mitochondrial (h-ND4) DNA fragments were detected by PCR (B). For the western blot, antibodies against cytochrome c, caspases-9, -7, -3 and -6 and histones H3 and H2B were detected. The normal cultured A549 cell and A549 apoptotic body were used as control groups (C). (D) The stability of MPs was analyzed under various conditions. A549-MPs were suspended in 0.1  $\mu$ m filtered PBS and treated with different conditions, including exposed to sunlight for 12 hours, suspended in pH 8.5 or 5.5 solution, shaken (2800rpm/min, Thermo Maxi Mix II Vortex) for 12 hours, put in RT or 37  $^{\circ}$ C for a week, dealt with Triton-100 (0.1%), SDS (0.1%, 0.5% and 1.0%) or proteinase K (0.5 $\mu$ g/ml) for 10 min. MPs were then recollected and mixed with 3  $\mu$ m latex beads for flow cytometric analysis. As indicated, gate 1 represented beads and gate 2 represented MPs. Error bars indicate mean  $\pm$ s.e.m.; n=3 independent experiments. \*\* $P$ <0.01, \*\*\* $P$ <0.001 versus control group.
