# Supplementary material
Source: PubMed Central journal article supplement (PMC4897183)
Supplement: cr201653x3.pdf [file cr201653x3.pdf]

Supplementary Figure 3

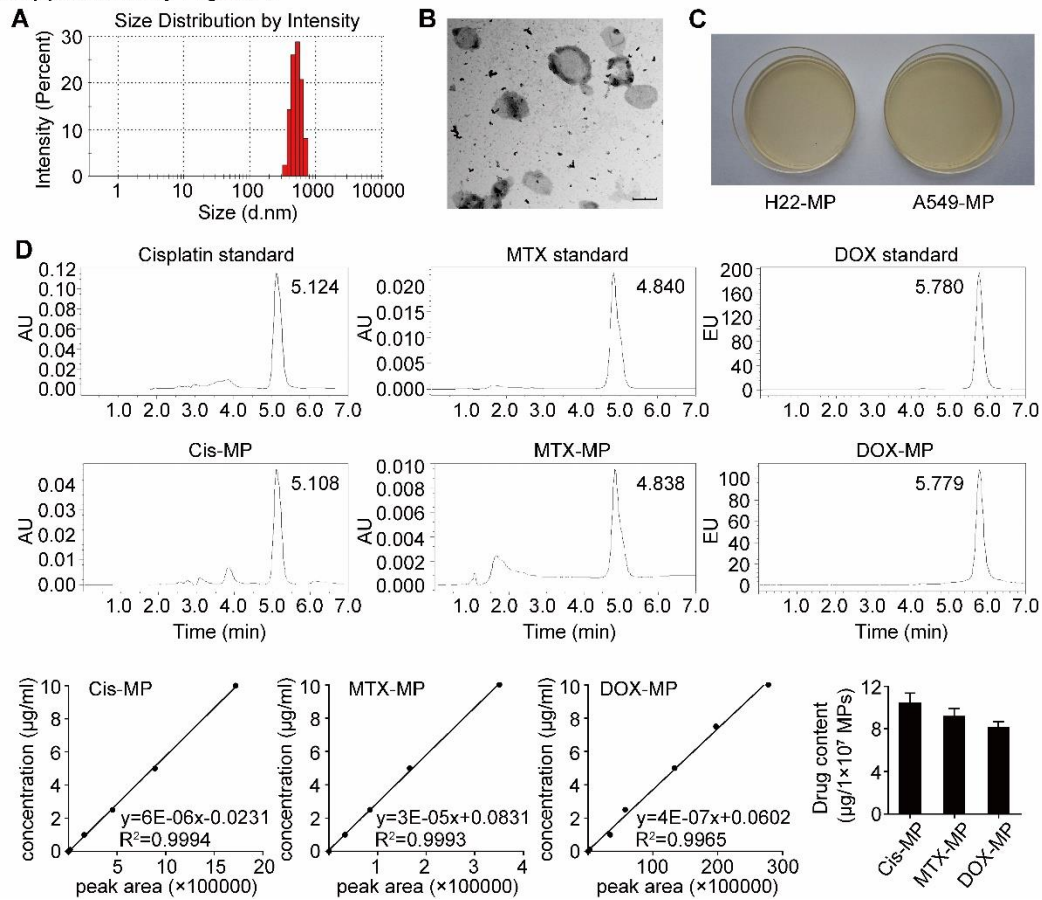

**Supplementary information, Figure S3. The size, sterility and drug concentration of A549 derived MPs (Related to Figure 1).** (A) Size distribution of the MPs was measured by Malvern Zetasizer Nano ZS90 particle size analyzer. (B) MPs were analyzed by transmission electron microscope. Scale bar, 200 nm. (C) MPs suspended in culture medium were incubated at 37 °C for 5 days. The medium was smeared on LB agar plate for bacteria growth. (D) HPLC analysis of the quantity of cisplatin, MTX or DOX in MPs.  $1 \times 10^8$  A549 tumor cells in 5 ml culture media were treated with 500  $\mu\text{g/ml}$  Cisplatin, 1mg/ml MTX and 500  $\mu\text{g/ml}$  DOX, respectively. The MPs were prepared and the drugs included were analyzed by HPLC. Drugs was quantified by using a Waters 2695 HPLC system on a  $\text{C}^{18}$  column. Drug contents of drug-MP were calculated according to the standard curve.
