# Supplementary material
Source: PubMed Central journal article supplement (PMC4897183)
Supplement: cr201653x6.pdf [file cr201653x6.pdf]

Supplementary Figure 6

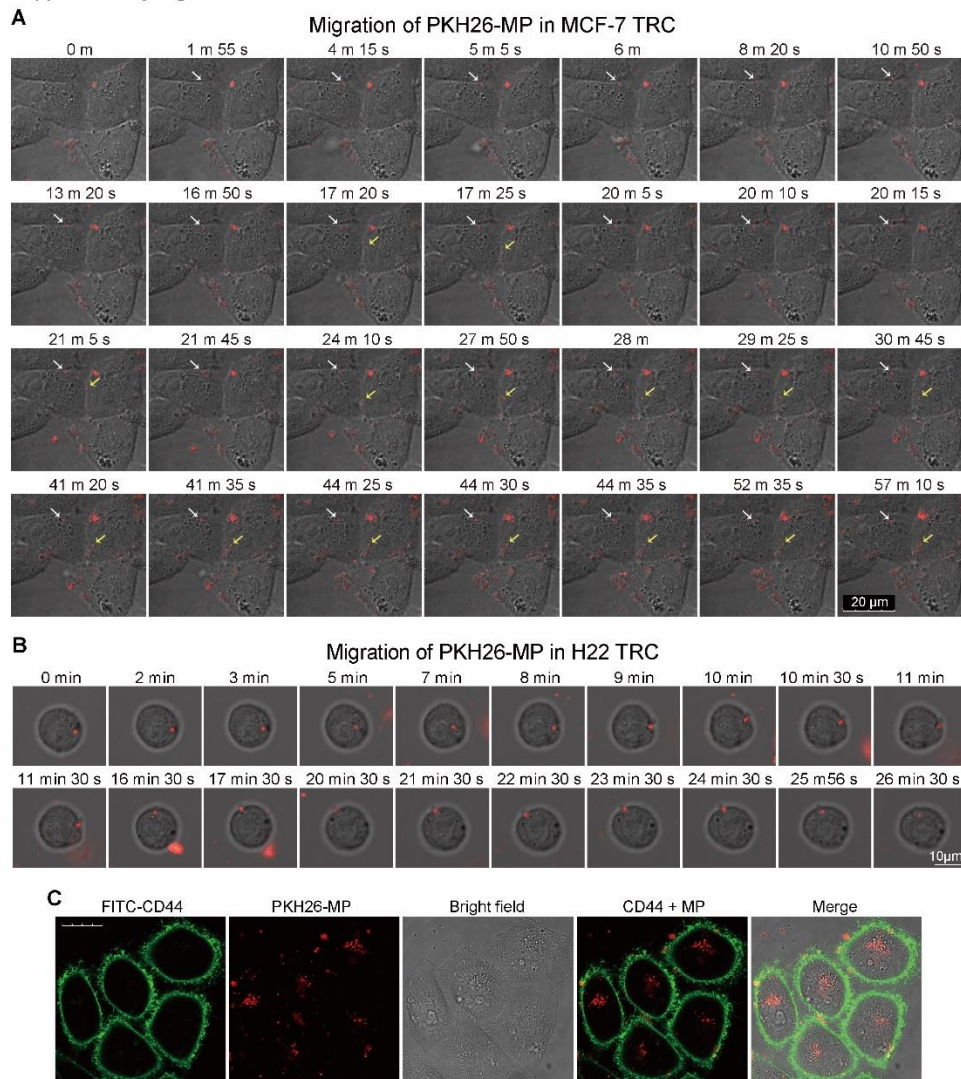

**Supplementary information, Figure S6. MPs entered the cytoplasm of TRC in an intact form without being packaged into the recipient cellular membrane (Related to Figure 3). (A) MPs enter the cytoplasm of MCF-7 TRC in an intact form. PKH26-MPs were incubated with MCF-7 TRCs. Under the two-photon microscope, time lapses of movements of MPs in the cytoplasm were recorded. The position of the MP in an individual cell was indicated by a white or yellow arrow. Scale bar, 20  $\mu\text{m}$ . (B) MPs enter the cytoplasm of H22 TRC in an intact form. PKH26-MPs were incubated with H22 TRCs. Under the two-photon microscope, the movement of MPs in the cytoplasm was observed. The data showed a 30 minutes time lapse of an individual cell. Scale bar, 10  $\mu\text{m}$ . (C) MPs enter the cytoplasm without being enclosed by the tumor plasma membrane. MCF-7 TRCs were stained with FITC-conjugated CD44 antibody. The cells were then incubated with PKH26-MPs for 4 hours and observed under the two-photon microscope. Scale bar, 20  $\mu\text{m}$ .**
