# Supplementary material
Source: PubMed Central journal article supplement (PMC4897183)
Supplement: cr201653x10.pdf [file cr201653x10.pdf]

Supplementary Figure 10

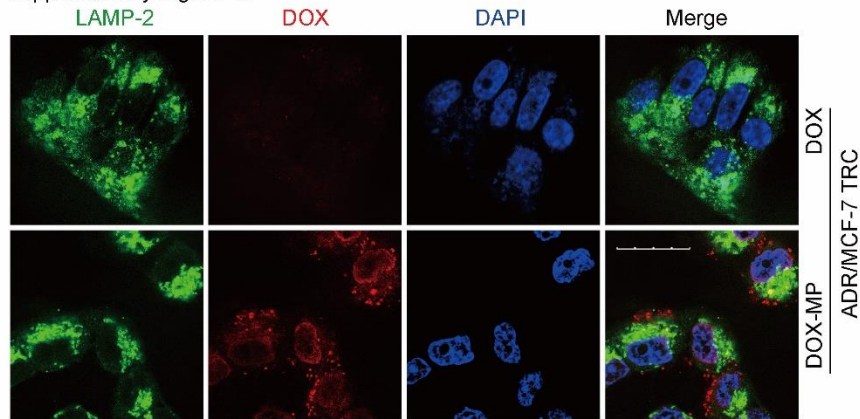

**Supplementary information, Figure S10. Drug-packaging MPs facilitate the entry of DOX into the nucleus** (Related to **Figure 5**). ADR/MCF-7 TRCs were treated with DOX or DOX-MPs for 12 hours and then stained with LAMP-2 antibody (green), DAPI (blue) and observed under two-photon confocal microscope. Scale bar, 20  $\mu\text{m}$ .
