# Supplementary material
Source: PubMed Central journal article supplement (PMC4897183)
Supplement: cr201653x11.pdf [file cr201653x11.pdf]

## Supplementary Figure 11

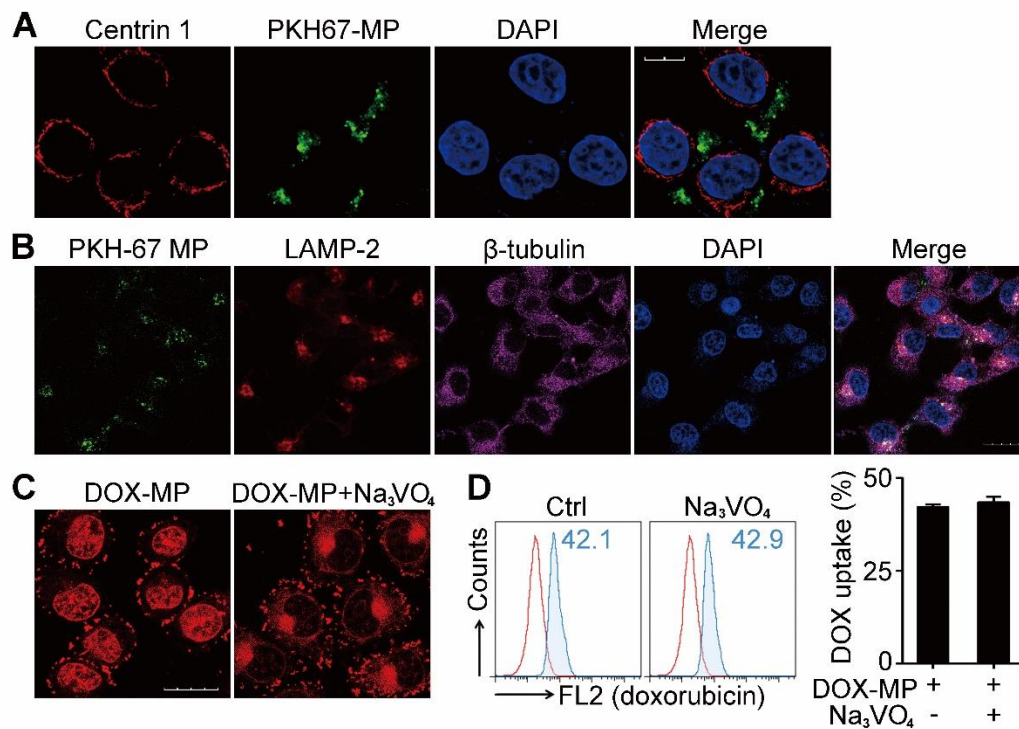

**Supplementary information, Figure S11. Microtubules but not centrosome were involved in the MP-mediated entry of drugs into the nucleus of TRCs (Related to Figure 6).** (A) Centrosome does not co-localize with MPs in MCF-7 TRC. PKH67-labeled MPs were incubated with MCF-7 TRCs for 12 hours. The cells were then stained with centrin-1 antibody (red). DAPI was used to stain the cell nuclei (blue). Scale bar, 10  $\mu\text{m}$ . (B) MPs co-localize with  $\beta$ -tubulin and LAMP-2 in MCF-7 TRCs. PKH67-labeling MPs were incubated with MCF-7 TRCs for 12 hours. Then the cells were stained with fluorescence-labeled anti- $\beta$ -tubulin antibody (purple) and LAMP-2 antibody (red). DAPI was used to stain the cell nuclei (blue). Scale bar, 20  $\mu\text{m}$ . (C) Inhibition of dynein activity hinders MP-mediated drug entry into the nucleus. MCF-7 TRCs were incubated with DOX-MPs for 4 hours. Cells were then treated with dynein inhibitor  $\text{Na}_3\text{VO}_4$  (100  $\mu\text{M}$ ) for 12 hours. Scale bar, 20  $\mu\text{m}$ . (D)  $\text{Na}_3\text{VO}_4$  did not affect the uptake of DOX-MPs into the cytoplasm of TRCs. Cells were pre-treated with or without dynein inhibitor  $\text{Na}_3\text{VO}_4$  (100  $\mu\text{M}$ ) for 12 hours. Cells were then incubated with DOX-MPs for 4 hours and uptake of DOX was detected by flow cytometry.
