# Supplementary material
Source: PubMed Central journal article supplement (PMC4897183)
Supplement: cr201653x12.pdf [file cr201653x12.pdf]

Supplementary Figure 12

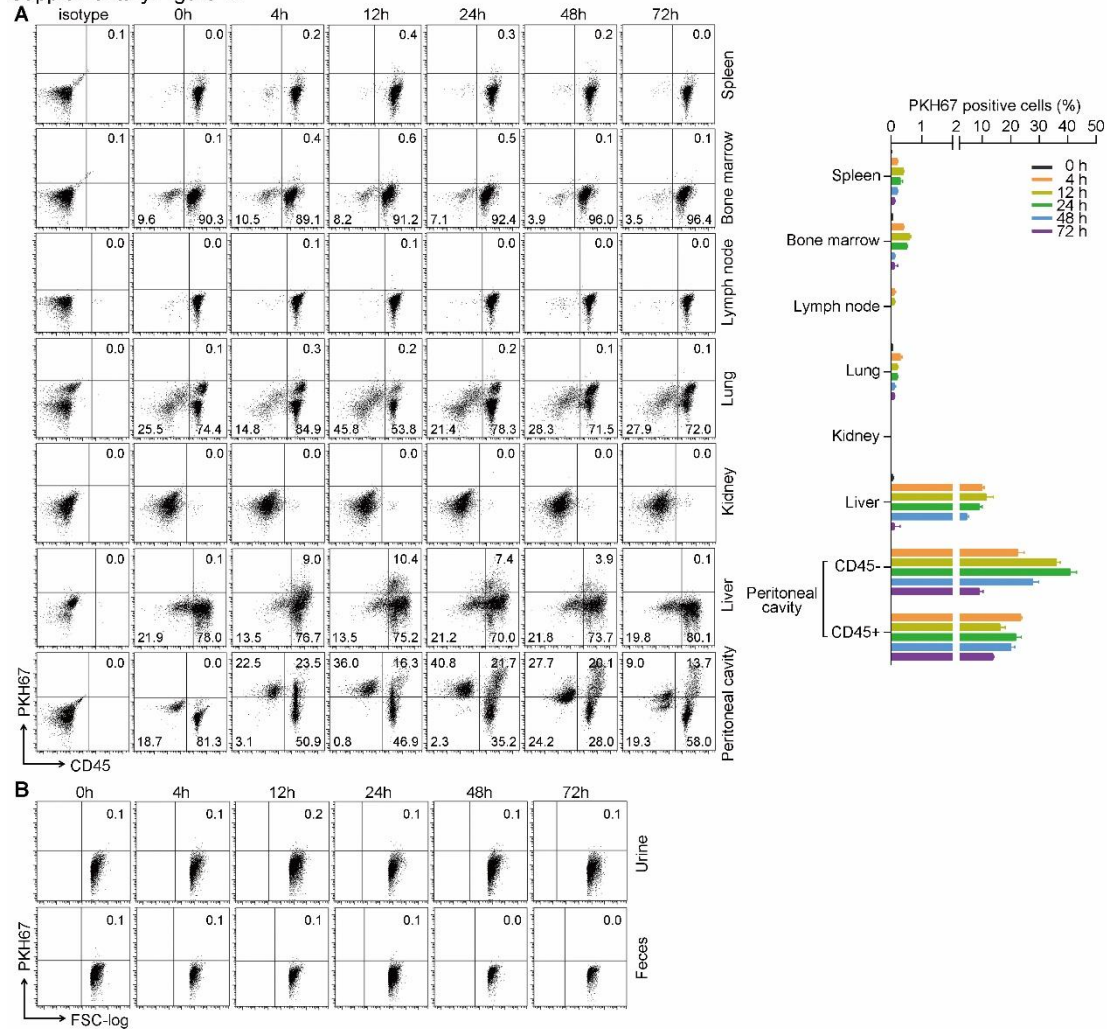

**Supplementary information, Figure S12. The distribution and fate of MPs were detected in mice bearing H22 malignant ascites (Related to Figure 7). (A) PKH67-stained MPs were intraperitoneal injected to mice bearing H22 malignant ascites, the distribution of MPs in spleen, bone marrow, lymph node, lung, kidney, liver and peritoneal cavity was evaluated by flow cytometry at different time points (0 h, 4 h, 12 h, 24 h, 48 h and 72 h). CD45 pan-immune cell marker was used to distinguish immune cells and tumor cells. (B) Urine and feces were collected and PKH67 positive MPs were detected by flow cytometry. Error bars indicate mean  $\pm$  s.e.m.; n=3 independent experiments.**
