# Supplementary material
Source: PubMed Central journal article supplement (PMC4897183)
Supplement: cr201653x13.pdf [file cr201653x13.pdf]

Supplementary Figure 13

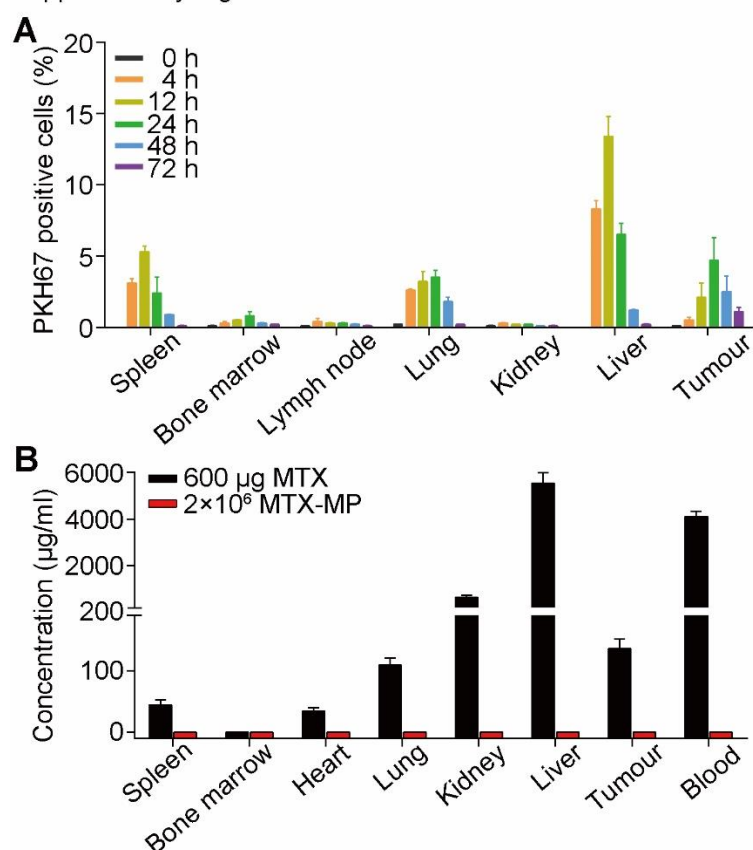

**Supplementary information, Figure S13.** (Related to **Figure 7**). (A) The distribution of MPs were detected in the tumor-bearing mice. PKH67-stained MPs were intravenous injected to tumor-bearing mice, the distribution of MPs in spleen, bone marrow, lymph node, lung, kidney, liver and tumor was evaluated by flow cytometry at different time points (0 h, 4 h, 12 h, 24 h, 48 h and 72 h). (B) 600 µg MTX as positive control was i.v. injected to tumor-bearing mice, 0.5h later, the tissues were homogenized for HPLC analysis of MTX concentration;  $2 \times 10^6$  MTX-MPs were i.v. injected to tumor-bearing mice, the final drug concentration in organs and tumor was detected at different time point (0.5 h, 1 h, 2 h, 4 h, 12 h, 24 h and 48 h) by HPLC. The 12h-drug concentration were showed.
