# Supplementary material
Source: PubMed Central journal article supplement (PMC4897183)
Supplement: cr201653x14.pdf [file cr201653x14.pdf]

Supplementary Table 1.

| Patient | Age/<br>Sex | Clinicopathologic<br>diagnosis | AJCC<br>Stage | Prior<br>treatment         | Pleural Infusion<br>Treatment (IP) | Changes of PE                   |                     |                        | Evaluation | Survival<br>(months) |
|---------|-------------|--------------------------------|---------------|----------------------------|------------------------------------|---------------------------------|---------------------|------------------------|------------|----------------------|
|         |             |                                |               |                            |                                    | UE                              | Color               | Turbidity              |            |                      |
| 1       | 66/F        | Lung<br>adenocarcinoma         | IV            | DP 4 cycles<br>PP 3 cycles | 5U cisplatin-MP<br>× 4 times       | B: left 6.4cm<br>A: left 2.9cm  | B: Red<br>A: Yellow | B: Turbid<br>A: Bright | PR         | 10                   |
| 2       | 58/M        | Lung<br>adenocarcinoma         | IV            | IP cisplatin<br>1 time     | 5U cisplatin-MP<br>× 4 times       | B: left 9.7cm<br>A: left 3.7cm  | B: Red<br>A: Yellow | B: Turbid<br>A: Bright | PR         | 6                    |
| 3       | 56/M        | Lung<br>adenocarcinoma         | IV            | PP 3 cycles<br>PC 2 cycles | 5U cisplatin-MP<br>× 4 times       | B: left 5.5cm<br>A: left —      | B: Red<br>A: Yellow | B: Turbid<br>A: Bright | CR         | 3                    |
| 4       | 64/F        | Lung<br>adenocarcinoma         | IV            | PP 3 cycles                | cisplatin 2 time<br>(60mg each)    | B: left 8.8cm<br>A: left 7.5cm  | B: Red<br>A: Red    | B: Turbid<br>A: Turbid | NC         | 5                    |
| 5       | 75/M        | Lung<br>adenocarcinoma         | IV            | PP 1 cycles                | cisplatin 2 times<br>(60mg each)   | B: left 8.9cm<br>A: left 11.8cm | B: Yellow<br>A: Red | B: Turbid<br>A: Turbid | NC         | 3                    |
| 6       | 58/F        | Lung<br>adenocarcinoma         | IV            | PP 2 cycles                | cisplatin 2 times<br>(60mg each)   | B: left 9.3cm<br>A: left 7.2cm  | B: Red<br>A: Red    | B: Turbid<br>A: Turbid | SD         | 2                    |

F: female; M: male; DP: docetaxel+cisplatin; PP: pemetrexed+cisplatin; PC: taxol+carboplatin; IP: intrapleural perfusion;

1U (1Unit)= $1 \times 10^7$  cisplatin-MP=10 $\mu$ g; PE: Pleural effusion; UE: ultrasonic examination; B: before; A: after; left: left pleural cavity;

PR: partial response; CR: complete remission; NC: no change; SD: stable disease.

**Supplementary information, Table S1. Outcomes of clinical treatment (Related to Figure 1).**
